# Supplementary material for: Using feces to indicate plastic pollution in terrestrial vertebrate species in western Thailand
Source: PeerJ. 2024 Jun 25;12:e17596. doi: 10.7717/peerj.17596 (PMC11212639; doi:10.7717/peerj.17596)
Supplement: Supplemental Information 1 — (A) is a data set as classified by individual scats. (B) data set using for generalized linear mode (GLM) using negative binomial. [file peerj-12-17596-s001.xlsx]

## Sheet: A
Scat_ID	species	X	Y	site	type	color	Size	length	piece	DryW-100g
1	Banteng	530720	1.58678e+06	Salakpra WS				#DIV/0!	0	0.919
2	Banteng	530720	1.58678e+06	Salakpra WS					0	1
3	Banteng	530721	1.58679e+06	Salakpra WS				0	0	1
4	Banteng	530726	1.58679e+06	Salakpra WS				0	0	1
5	Burmese hare	475402	1.57727e+06	Saiyok NP					0	0.068
6	Burmese hare	475397	1.57726e+06	Saiyok NP					0	0.071
7	Butterfly lizard	530901	1.5894e+06	Salakpra WS					0	0.016
8	Butterfly lizard	530938	1.58942e+06	Salakpra WS	fiber	blue	G3	842.69	1	0.015
9	Butterfly lizard	530939	1.58942e+06	Salakpra WS	fiber	blue	G4	1378.12	1	0.011
9	Butterfly lizard	530939	1.58942e+06	Salakpra WS	fiber	blue	G4	1476.67	1	0.011
9	Butterfly lizard	530939	1.58942e+06	Salakpra WS	fiber	blue	G4	1879.25	1	0.011
10	Dhole	524945	1584588	Salakpra WS	fiber	black	G5	2859.58	1	0.15
11	Dhole	462534	1606114	Saiyok NP	fiber	blue	G2	279.03	1	0.019
11	Dhole	462534	1606114	Saiyok NP	fiber	black	G3	954.09	1	0.019
12	Eld's deer	529771	1.58591e+06	Salakpra WS	fiber	blue	G4	1340.66	1	0.047
12	Eld's deer	529771	1.58591e+06	Salakpra WS	fiber	blue	G4	1368.66	1	0.047
13	Eld's deer	529767	1.58589e+06	Salakpra WS					0	0.171
14	Eld's deer	529768	1.58591e+06	Salakpra WS					0	0.15
15	Eld's deer	529767	1585786	Salakpra WS					0	0.392
16	Eld's deer	529765	1585873	Salakpra WS					0	0.044
17	Eld's deer	529769	1585878	Salakpra WS					0	0.06
18	Eld's deer	529756	1585879	Salakpra WS					0	0.055
19	Eld's deer	529742	1585877	Salakpra WS					0	0.1
20	Eld's deer	529744	1585875	Salakpra WS					0	0.101
21	Elephant	464823	1.60344e+06	Saiyok NP	fiber	black	G5	2697.91	1	0.964
22	Elephant	465354	1.60576e+06	Saiyok NP	fragment	black	G2	377.92	1	0.668
23	Elephant	516704	1.59015e+06	Srinakarin NP					0	1
24	Elephant	516441	1.59394e+06	Srinakarin NP					0	1
25	Elephant	518478	1.61344e+06	Srinakarin NP	fiber	black	G3	625.25	1	1
25	Elephant	518478	1.61344e+06	Srinakarin NP	fiber	blue	G4	1832.33	1	1
26	Elephant	518416	1.61261e+06	Srinakarin NP					0	1
27	Elephant	518062	1.6122e+06	outside	fiber	black	G3	876.44	1	1
28	Elephant	519018	1.61039e+06	Srinakarin NP	fiber	black	G4	1953.06	1	1
29	Elephant	520804	1.6099e+06	Srinakarin NP	fiber	black	G4	1369.45	1	1
30	Elephant	528649	1.56792e+06	Salakpra WS					0	0.895
31	Elephant	530943	1.56621e+06	Salakpra WS	fiber	black	G3	579.96	1	0.875
31	Elephant	530943	1.56621e+06	outside	fiber	black	G3	589.77	1	0.875
32	Elephant	530634	1.58674e+06	Salakpra WS					0	1
33	Elephant	530763	1.58679e+06	Salakpra WS	fiber	green	G3	663.04	1	1
33	Elephant	530763	1.58679e+06	Salakpra WS	fiber	black	G3	818.01	1	1
34	Elephant	530771	1.58678e+06	Salakpra WS	fiber	black	G5	2044.77	1	0.89
35	Elephant	530774	1.58674e+06	Salakpra WS					0	1
36	Elephant	530742	1.58674e+06	Salakpra WS					0	1
37	Elephant	529600	1.59157e+06	Salakpra WS	fiber	black	G3	936.74	1	1
37	Elephant	529600	1.59157e+06	Salakpra WS	fiber	black	G4	1661.16	1	1
37	Elephant	529600	1.59157e+06	Salakpra WS	fiber	black	G5	2283.41	1	1
38	Elephant	529618	1.59157e+06	Salakpra WS	fiber	black	G4	1171.87	1	1
38	Elephant	529618	1.59157e+06	Salakpra WS	fiber	black	G4	1545.44	1	1
38	Elephant	529618	1.59157e+06	Salakpra WS	fiber	black	G7	4515.78	1	1
39	Elephant	530849	1.58939e+06	Salakpra WS	fragment	blue	G3	916.2	1	1
40	Elephant	515714	1.58926e+06	Thongphaphum NP	fiber	black	G3	526.73	1	1
40	Elephant	515714	1.58926e+06	Thongphaphum NP	fiber	blue	G3	901.73	1	1
40	Elephant	515714	1.58926e+06	Thongphaphum NP	fiber	black	G4	1851.86	1	1
40	Elephant	515714	1.58926e+06	Thongphaphum NP	fiber	black	G5	2201.37	1	1
41	Elephant	482337	1627781	Srinakarin NP	fragment	black	G2	134.81	1	0.8594
41	Elephant	482337	1627781	Srinakarin NP	fiber	lightblue	G3	667.99	1	0.8594
42	Elephant	483947	1596067	Saiyok NP					0	0.26163
43	Elephant	520822	1609942	Salakpra WS	fiber	black	G4	1708.65	1	0.325
43	Elephant	520822	1609942	Salakpra WS	fiber	blue	G8	5277.93	1	0.325
44	Elephant	521549	1610207	Salakpra WS					0	0.347
45	Elephant	466972	1605545	Thongphaphum NP	fiber	black	G3	704.41	1	0.36582
45	Elephant	466972	1605545	Thongphaphum NP	fiber	red	G4	1661.68	1	0.36582
45	Elephant	466972	1605545	Thongphaphum NP	fiber	blue	G8	5137.53	1	0.36582
46	Elephant	521563	1610208	Salakpra WS	fiber	black	G8	5352.98	1	0.295
47	Elephant	521562	1610210	Salakpra WS					0	0.291
48	Elephant	521561	1610211	Salakpra WS	fiber	black	G6	3208.1	1	0.36
49	Elephant	526733	1585415	Salakpra WS					0	0.435
50	Elephant	526756	1585412	Salakpra WS					0	0.433
51	Elephant	526785	1585410	Salakpra WS					0	0.48
52	Elephant	527124	1585415	Salakpra WS					0	0.545
53	Elephant	463679	1605965	Saiyok NP	fiber	black	G4	1243.1	1	0.2459
53	Elephant	463679	1605965	Saiyok NP	fiber	black	G4	1305.51	1	0.2459
53	Elephant	463679	1605965	Saiyok NP	fiber	blue	G4	1784.97	1	0.2459
54	Elephant	527157	1585425	Salakpra WS					0	0.83
55	Elephant	463677	1606090	Saiyok NP	fiber	black	G2	190.13	1	0.46539
55	Elephant	463677	1606090	Saiyok NP	fiber	black	G3	637.11	1	0.46539
55	Elephant	463677	1606090	Saiyok NP	fiber	black	G3	647.91	1	0.46539
55	Elephant	463677	1606090	Saiyok NP	fiber	black	G4	1230.79	1	0.46539
56	Elephant	462449	1606126	outside					0	0.42077
57	Elephant	462451	1606040	Saiyok NP					0	0.18564
58	Elephant	462773	1605884	Saiyok NP					0	0.49762
59	Elephant	462760	1605885	Saiyok NP	fiber	black	G4	1050.18	1	0.29742
60	Gaur	491492	1672687	Thung Yai W	fiber	black	G3	836.96	1	0.5763
60	Gaur	491492	1672687	Thung Yai W	fiber	black	G6	3496.21	1	0.5763
61	Gaur	491492	1672687	Thung Yai W	fiber	black	G2	215.52	1	0.6075
61	Gaur	491492	1672687	Thung Yai W	fiber	black	G2	378.09	1	0.6075
61	Gaur	491492	1672687	Thung Yai W	fiber	yellow	G2	433.4	1	0.6075
61	Gaur	491492	1672687	Thung Yai W	fiber	yellow	G3	967.7	1	0.6075
61	Gaur	491492	1672687	Thung Yai W	fiber	blue	G4	1071.74	1	0.6075
62	Monkey	517083	1561950	outside					0	0.58
63	Muntjac	517206	1.6771e+06	Huai Kha Khaeng WS	fiber	blue	G4	1815.8	1	0.086
63	Muntjac	517206	1.6771e+06	Huai Kha Khaeng WS	fiber	cloudy white	G5	2121.53	1	0.086
63	Muntjac	517206	1.6771e+06	Huai Kha Khaeng WS	fiber	blue	G6	3867.89	1	0.086
64	Sambar	518050	1.71035e+06	Huai Kha Khaeng WS	fiber	black	G5	2200.2	1	0.017
65	Sambar	517206	1.6771e+06	Huai Kha Khaeng WS					0	0.351
66	Sambar	475432	1.57719e+06	Saiyok NP					0	0.368
67	Sambar	518049	1710337	Huai Kha Khaeng WS	fiber	blue	G4	1383.84	1	0.097
68	Sambar	475515	1.57722e+06	Saiyok NP					0	0.12
69	Sambar	475517	1.57722e+06	Saiyok NP					0	0.11
70	Sambar	475531	1.57722e+06	Saiyok NP					0	0.383
71	Sambar	530940	1.58942e+06	Erawan NP					0	0.832
72	Sambar	514019	1.58728e+06	Erawan NP					0	0.566
73	Sambar	514009	1.5873e+06	Erawan NP					0	0.484
74	Sambar	488799	1672019	Erawan NP	fiber	transparent	G5	2624.66	1	0.132
75	Sambar	514119	1.58739e+06	Erawan NP					0	0.178
76	Sambar	514879	1.58706e+06	Erawan NP					0	1
77	Sambar	514886	1.58705e+06	Erawan NP					0	0.678
78	Sambar	488799	1672019	Thung Yai W	fiber	blue	G2	250.93	1	0.253
78	Sambar	488799	1672019	Thung Yai W	fiber	blue	G2	371.85	1	0.253
78	Sambar	488799	1672019	Thung Yai W	fiber	black	G2	410.63	1	0.253
78	Sambar	488799	1672019	Thung Yai W	film	lightblue	G2	466.23	1	0.253
78	Sambar	488799	1672019	Thung Yai W	fiber	black	G3	553.7	1	0.253
78	Sambar	488799	1672019	Thung Yai W	fiber	black	G3	786.79	1	0.253
78	Sambar	488799	1672019	Thung Yai W	fiber	black	G3	842.55	1	0.253
78	Sambar	488799	1672019	Thung Yai W	fiber	yellow	G4	1070.54	1	0.253
78	Sambar	488799	1672019	Thung Yai W	fiber	black	G4	1252.9	1	0.253
78	Sambar	488799	1672019	Thung Yai W	fiber	yellow	G4	1516.5	1	0.253
78	Sambar	488799	1672019	Thung Yai W	fiber	blue	G4	1581.11	1	0.253
78	Sambar	488799	1672019	Thung Yai W	fiber	blue	G4	1611.17	1	0.253
78	Sambar	488799	1672019	Thung Yai W	fiber	yellow	G5	2718.56	1	0.253
78	Sambar	488799	1672019	Thung Yai W	fiber	lightblue	G6	3286.46	1	0.253
78	Sambar	488799	1672019	Thung Yai W	fiber	yellow	G7	4647.61	1	0.253
79	Sambar	514107	1587001	Erawan NP					0	0.268
80	Sambar	514086	1586977	Erawan NP	fiber	black	G4	1524.33	1	0.43
81	Sambar	514056	1586963	Erawan NP					0	1
82	Wild buffalo	517206	1.6771e+06	Huai Kha Khaeng WS					0	0.804
83	Wildboar	514913	1.58704e+06	Erawan NP					0	1
84	Wildboar	515678	1.58925e+06	Erawan NP					0	0.332
85	Wildboar	515690	1.58926e+06	Erawan NP	fiber	transparent	G4	1960.49	1	0.413
85	Wildboar	515690	1.58926e+06	Erawan NP	fiber	blue	G5	2370.42	1	0.413
86	Wildboar	515653	1589376	Erawan NP	fiber	black	G5	2292.8	1	0.206
87	Wildboar	515697	1589254	Erawan NP	fiber	black	G2	468.91	1	0.091
87	Wildboar	515697	1589254	Erawan NP	fiber	black	G7	4110.3	1	0.091
88	Wildboar	515653	1589372	Erawan NP					0	0.11236
89	Wildboar	515660	1589375	Erawan NP					0	0.106
90	Wildboar	515655	1589371	Erawan NP					0	0.13365

## Sheet: B
point	ID	dw	species	group	Mpfound	PA	Lu	Lutype	Total	Dtotal	DstLandmark	Slope	Elevation	DistToursite	LandfillDist	DistFactory	Soilall	population	Distvillage	AllW	Sed	Distminiroad	wshdClass
163	60	0.5763	Gaur	Lmammal	yes	Thungyai	Forest	Evergreen forest	2	3.47041	17362.5	12.0394	880	28232.8	8658.67	36531.6	16	721	3001.27	42	17	11.0034	3
164	61	0.6075	Gaur	Lmammal	yes	Thungyai	Forest	Evergreen forest	5	8.23045	17362.5	12.0394	880	28232.8	8658.67	36531.6	16	721	1837.62	42	17	5.1899	3
1652	78	0.253	Sambar	Mmammal	yes	Thungyai	Forest	Evergreen forest	15	59.2885	15406.7	8.11949	804	25470.6	7213.94	33865.2	16	721	2993.72	42	17	5.22859	3
128	40	1	Elephant	Vlmammal	yes	Thongphaphum	Forest	Deciduous forest	4	4	2136.17	3.82583	80	4126.18	464.038	17912.7	11	153	7011.79	10	1	120.614	4
F2	45	0.36582	Elephant	Vlmammal	yes	Thongphaphum	Forest	Deciduous forest	3	8.20075	10869.9	2.78029	549	7745.81	6009.62	7065.48	4	478	5281.91	21	6	39.9414	4
160	41	0.8594	Elephant	Vlmammal	yes	Srinakarin	Forest	Deciduous forest	2	2.32721	12903.3	0.958891	693	3068.24	5804.59	12040.8	19	1089	4446.6	5	5	19.4928	3
71	1	0.919	Banteng	Lmammal	no	Salakpra	Forest	Deciduous forest	0	0	11359.6	5.00443	176	8394.41	9422.99	25891.1	4	721	9888.01	6	14	3650.04	4
72	2	1	Banteng	Lmammal	no	Salakpra	Forest	Deciduous forest	0	0	11366	5.00443	176	8400.39	9427	25896.2	4	721	9794.9	6	14	3739.76	4
73	3	1	Banteng	Lmammal	no	Salakpra	Forest	Deciduous forest	0	0	11375.9	5.54754	180	8407.27	9434.39	25904.9	4	721	9885.47	6	14	3652	4
74	4	1	Banteng	Lmammal	no	Salakpra	Forest	Deciduous forest	0	0	11374.8	5.00443	176	8400.63	9436.37	25905.6	4	721	9886.73	6	14	3650.96	4
84	7	0.016	Butterfly lizard	reptile	no	Salakpra	Forest	Deciduous forest	0	0	13844.3	3.99264	208	10383.9	11331.2	28048.6	4	721	3012.81	42	17	75.1227	3
85	8	0.015	Butterfly lizard	reptile	yes	Salakpra	Forest	Deciduous forest	1	66.6667	13872.8	2.08659	206	10378.3	11371.3	28083.8	4	721	2976.59	42	17	89.9168	3
86	9	0.011	Butterfly lizard	reptile	yes	Salakpra	Forest	Deciduous forest	3	272.727	13874.8	2.08659	206	10379.2	11372.9	28085.8	4	721	9086.4	6	14	3653	3
F23	10	0.15	Dhole	Lmammal	yes	Salakpra	Forest	Deciduous forest	1	6.66667	8148.12	5.86452	84	12126.1	4006.43	20693.8	5	284	8303.8	29	2	1216.04	5
67	12	0.047	Eld's deer	Lmammal	yes	Salakpra	Forest	Deciduous forest	2	42.5532	10182	3.01528	171	8493.8	8140.25	24615.1	4	284	9655.49	29	2	1530.3	5
68	13	0.171	Eld's deer	Lmammal	no	Salakpra	Forest	Deciduous forest	0	0	10185.8	2.86962	171	8499.32	8141.29	24617.3	4	284	9632.74	29	2	1478.53	5
69	14	0.15	Eld's deer	Lmammal	no	Salakpra	Forest	Deciduous forest	0	0	10164.1	3.01528	171	8486.06	8126.17	24598.9	4	284	9607.25	29	2	1480.98	5
F28	15	0.392	Eld's deer	Lmammal	no	Salakpra	Forest	Deciduous forest	0	0	10068.4	5.99219	171	8421.57	8063.17	24519.7	4	284	8329.69	29	2	1240.56	5
F29	16	0.044	Eld's deer	Lmammal	no	Salakpra	Forest	Deciduous forest	0	0	10147.9	2.86961	172	8477.12	8114.42	24584.9	4	284	9653.54	29	2	1516.96	5
F30	17	0.06	Eld's deer	Lmammal	no	Salakpra	Forest	Deciduous forest	0	0	10154.1	2.86961	172	8477.12	8120.64	24591.3	4	284	9626.05	29	2	1532.1	5
F31	18	0.055	Eld's deer	Lmammal	no	Salakpra	Forest	Deciduous forest	0	0	10150	2.86961	172	8487.9	8110.96	24583.7	4	284	8310.02	29	2	1222.15	5
F32	19	0.1	Eld's deer	Lmammal	no	Salakpra	Forest	Deciduous forest	0	0	10142.9	2.66396	173	8497.6	8098.67	24573.1	4	284	8330.74	29	2	1241.34	5
F33	20	0.101	Eld's deer	Lmammal	no	Salakpra	Forest	Deciduous forest	0	0	10141.8	2.66396	173	8494.79	8099.02	24572.9	4	284	8315.58	29	2	1227.07	5
30	23	1	Elephant	Vlmammal	no	Salakpra	Forest	Deciduous forest	0	0	3077.6	3.37388	240	3303.16	621.158	19172.8	11	109	4641.84	4	18	13.8957	3
31	24	1	Elephant	Vlmammal	no	Salakpra	non-forest	non-forest	0	0	4995.25	1.85433	229	720.139	2245.06	21764.8	11	348	1332.67	7	3	73.0284	5
40	25	1	Elephant	Vlmammal	yes	Salakpra	Forest	Deciduous forest	2	2	6080.62	11.0327	196	16603.3	4257.08	5469.47	8	731	18189.9	9	8	98.8321	1
41	26	1	Elephant	Vlmammal	no	Salakpra	Forest	Evergreen forest	0	0	6150.16	13.6562	202	17063.9	4197.66	5777.65	8	731	18835.1	9	8	41.1072	1
43	28	1	Elephant	Vlmammal	yes	Salakpra	non-forest	non-forest	1	1	7512.79	14.4588	206	17284.4	3898.06	7580.25	8	425	1116.47	7	3	9.51744	4
44	29	1	Elephant	Vlmammal	yes	Salakpra	Forest	Deciduous forest	1	1	9326.96	9.38815	192	16756.4	4377.41	9272.1	8	284	5850.54	29	2	6.10254	3
50	30	0.895	Elephant	Vlmammal	no	Salakpra	non-forest	non-forest	0	0	5993.77	3.37291	70	6185.59	226.257	10214.4	12	721	3000.19	42	17	7.8846	3
70	32	1	Elephant	Vlmammal	no	Salakpra	Forest	Deciduous forest	0	0	11289.2	2.08654	179	8426.1	9331.97	25806.5	4	721	9847.06	6	14	3688.58	4
75	33	1	Elephant	Vlmammal	yes	Salakpra	Forest	Deciduous forest	2	2	11391.6	5.51967	178	8377.04	9465.86	25930.3	4	284	9616.67	29	2	1526.29	5
76	34	0.89	Elephant	Vlmammal	yes	Salakpra	Forest	Deciduous forest	1	1.1236	11383.3	5.51967	178	8362.39	9463.94	25925.6	4	284	9624.08	29	2	1536.51	5
78	35	1	Elephant	Vlmammal	no	Salakpra	Forest	Deciduous forest	0	0	11350.4	3.93401	178	8331.6	9443.21	25898.9	4	284	9521.68	29	2	1493.57	5
79	36	1	Elephant	Vlmammal	no	Salakpra	Forest	Deciduous forest	0	0	11336.3	3.01537	175	8353.33	9417.67	25877.8	4	284	9612.65	29	2	1518.84	5
80	37	1	Elephant	Vlmammal	yes	Salakpra	Forest	Deciduous forest	3	3	13713.6	2.78029	256	12914.1	11087.2	28781.3	4	721	9102.6	6	14	3642.73	3
82	38	1	Elephant	Vlmammal	yes	Salakpra	Forest	Deciduous forest	3	3	13731.2	5.31709	258	12901	11101.2	28793.5	4	284	4183.88	3	1	5.04831	3
83	39	1	Elephant	Vlmammal	yes	Salakpra	non-forest	non-forest	1	1	13815.8	6.92043	210	10402.1	11279.2	28009	4	721	2999.24	42	17	89.2402	3
F18	43	0.325	Elephant	Vlmammal	yes	Salakpra	Forest	Deciduous forest	1	3.07692	9323.1	7.61824	190	16712.9	4424.96	9259.03	8	284	5834.42	29	2	2.41564	3
F19	44	0.347	Elephant	Vlmammal	no	Salakpra	Forest	Deciduous forest	0	0	9878.59	10.9464	206	16001	5059.76	9703.98	8	284	6096.79	29	2	64.7685	3
F20	46	0.295	Elephant	Vlmammal	yes	Salakpra	Forest	Deciduous forest	1	3.38983	9891.14	10.9464	206	15990.2	5069.12	9715.18	8	109	4801.06	4	18	3.15095	2
F21	47	0.291	Elephant	Vlmammal	no	Salakpra	Forest	Deciduous forest	0	0	9889.45	10.9464	206	15989.5	5070.08	9713.25	8	284	6067.81	29	2	42.5486	3
F22	48	0.36	Elephant	Vlmammal	yes	Salakpra	Forest	Deciduous forest	1	2.77778	9888.15	10.9464	206	15989.6	5070.26	9711.87	8	280	3991.33	4	18	13.3404	3
F24	49	0.435	Elephant	Vlmammal	no	Salakpra	Forest	Deciduous forest	0	0	8960.21	4.62737	124	10798.5	5634.21	22372.1	4	284	8300.37	29	2	1211.98	5
F25	50	0.433	Elephant	Vlmammal	no	Salakpra	Forest	Deciduous forest	0	0	8959.42	5.00439	124	10776.6	5645.7	22382.8	4	284	8288.09	29	2	1199.33	5
F26	51	0.48	Elephant	Vlmammal	no	Salakpra	Forest	Deciduous forest	0	0	8960.29	7.90579	126	10749.7	5661.71	22397.8	4	284	8288.44	29	2	1199.83	5
F27	52	0.545	Elephant	Vlmammal	no	Salakpra	non-forest	non-forest	0	0	9005.48	8.01352	129	10450.2	5877.98	22598.3	4	425	604.362	7	3	0.508669	4
F34	54	0.83	Elephant	Vlmammal	no	Salakpra	Forest	Deciduous forest	0	0	9019.97	2.66394	125	10425.6	5906.91	22625.7	4	284	8252.35	29	2	1171.31	5
103	71	0.832	Sambar	Mmammal	no	Salakpra	non-forest	non-forest	0	0	13877.8	2.08659	206	10381.1	11374.7	28088.7	4	721	2993.58	42	17	92.4495	3
4	5	0.068	Wild rabbit	Smammal	no	Saiyok	Forest	Deciduous forest	0	0	17269.2	1.85433	337	20476.4	17191.1	25058.1	11	109	5485.71	4	18	2.57573	3
5	6	0.071	Wild rabbit	Smammal	no	Saiyok	Forest	Deciduous forest	0	0	17277.5	1.85433	337	20486.7	17201	25068.3	11	109	5484.7	4	18	3.98175	3
F7	11	0.019	Dhole	Lmammal	yes	Saiyok	Forest	Deciduous forest	2	105.263	14860.6	2.94023	295	11719.2	7590.9	10113.4	3	478	5286.08	21	6	20.1156	4
12	21	0.964	Elephant	Vlmammal	yes	Saiyok	Forest	Deciduous forest	1	1.03734	11691.3	2.9402	118	10651.5	8752.91	10053.3	4	478	5195.06	21	6	159.943	4
15	22	0.668	Elephant	Vlmammal	yes	Saiyok	Forest	Deciduous forest	1	1.49701	12285	30.051	449	9139.66	6396.77	8021.05	4	478	5187.51	21	6	94.2125	4
F1	42	0.26163	Elephant	Vlmammal	no	Saiyok	Forest	Deciduous forest	0	0	12118.7	4.72458	86	333.866	142.729	4928.55	4	478	5268.81	21	6	36.3525	4
F3	53	0.2459	Elephant	Vlmammal	yes	Saiyok	non-forest	non-forest	3	12.2001	13803.2	7.22262	334	10656.8	6995.07	9217.5	4	444	2854.94	42	17	1.10535	4
F4	55	0.46539	Elephant	Vlmammal	yes	Saiyok	Forest	Deciduous forest	4	8.59494	13768.7	13.5394	330	10623.2	6893.58	9150.02	4	478	5166.42	21	6	136.072	4
F6	57	0.18564	Elephant	Vlmammal	no	Saiyok	Forest	Deciduous forest	0	0	14960.3	5.62865	288	11818.2	7701.5	10222.1	3	478	4379.47	21	6	763.017	4
F8	58	0.49762	Elephant	Vlmammal	no	Saiyok	Forest	Deciduous forest	0	0	14693.8	3.41688	306	11548.9	7607.44	10024.2	3	478	4350.59	21	6	791.321	4
F9	59	0.29742	Elephant	Vlmammal	yes	Saiyok	Forest	Deciduous forest	1	3.36225	14706	9.24323	304	11561.1	7615	10034.7	3	478	5147.74	21	6	107.925	4
3	66	0.368	Sambar	Mmammal	no	Saiyok	Forest	Deciduous forest	0	0	17349.6	2.08638	339	20532	17228.9	25120	11	109	5485.92	4	18	1.38437	3
6	68	0.12	Sambar	Mmammal	no	Saiyok	Forest	Deciduous forest	0	0	17342.4	9.48251	347	20475.4	17157.3	25070.7	11	280	3674.19	4	18	27.3376	3
7	69	0.11	Sambar	Mmammal	no	Saiyok	Forest	Deciduous forest	0	0	17335.3	9.48251	347	20467.6	17150.3	25062.9	11	280	4112.81	4	18	4.11169	3
8	70	0.383	Sambar	Mmammal	no	Saiyok	Forest	Deciduous forest	0	0	17339.1	9.48251	347	20462.2	17141.5	25059	11	109	5475.56	4	18	9.47721	3
42	27	1	Elephant	Vlmammal	yes	outside	Forest	Evergreen forest	1	1	5915.83	20.4966	193	17575.9	3912.18	5698.47	8	731	18835.1	9	8	41.1072	1
62	31	0.875	Elephant	Vlmammal	yes	outside	Forest	Deciduous forest	2	2.28571	3133.01	1.91246	69	5142.43	309.664	8425.31	12	284	5822.83	29	2	10.5244	3
F5	56	0.42077	Elephant	Vlmammal	no	outside	Forest	Deciduous forest	0	0	14939.4	3.37458	290	11798.5	7639.55	10181.5	3	478	4387.05	21	6	755.911	4
F35	62	0.58	Long-tailed macaque	Mmammal	no	outside	non-forest	non-forest	0	0	1772.27	9.24306	263	11322.1	237.367	3517.93	4	721	2999.62	42	17	10.9091	3
1	63	0.086	Northern red muntjac	Mmammal	yes	Huai Kha Khaeng	Forest	Deciduous forest	3	34.8837	14387.8	2.8	286	41538.5	40376.6	98355.6	0	657	13931.1	0	0	14	3
1	64	0.017	Sambar	Mmammal	yes	Huai Kha Khaeng	Forest	Deciduous forest	1	58.8235	27389.3	8	320	22116.5	42352	1246782	0	424	27871.7	0	0	11102	3
2	65	0.351	Sambar	Mmammal	no	Huai Kha Khaeng	Forest	Deciduous forest	0	0	14387.8	3	296	41538.5	40376.6	98355.6	0	657	13931.1	0	0	14	3
1	82	0.804	Wild buffalo	Vlmammal	no	Huai Kha Khaeng	Forest	Deciduous forest	0	0	14387.8	3.8	301	41538.5	40376.6	98355.6	0	657	13931.1	1	0	14	3
4	67	0.097	Sambar	Mmammal	yes	Huai Kha Khaeng	Forest	Deciduous forest	1	10.3093	27389.3	7	313	22116.5	42352	1246782	0	424	27871.7	0	0	11102	3
104	72	0.566	Sambar	Mmammal	no	Erawan	Forest	Deciduous forest	0	0	2543.59	2.93999	525	6405.3	2141.94	15377.6	5	109	4848.75	4	18	40.1256	4
106	73	0.484	Sambar	Mmammal	no	Erawan	Forest	Deciduous forest	0	0	2518.88	2.08655	527	6385.91	2130.11	15394.4	5	153	4278.61	10	1	4.08743	1
107	74	0.132	Sambar	Mmammal	yes	Erawan	Forest	Deciduous forest	1	7.57576	2482.12	2.08655	527	6349.89	2100.65	15428.6	5	153	5540.05	10	1	1.14605	2
108	75	0.178	Sambar	Mmammal	no	Erawan	non-forest	non-forest	0	0	2452.82	7.37886	530	6270.95	1994.2	15519.7	5	613	1176.86	154	3	293.151	4
110	76	1	Sambar	Mmammal	no	Erawan	Forest	Deciduous forest	0	0	2997.9	0.92741	521	6407.89	1934.18	15588.9	5	295	7815.35	7	1	15.4724	2
111	77	0.678	Sambar	Mmammal	no	Erawan	Forest	Deciduous forest	0	0	3008.26	0.92741	521	6415.03	1940.59	15584.8	5	295	7740.32	7	1	16.6133	2
F10	79	0.268	Sambar	Mmammal	no	Erawan	Forest	Deciduous forest	0	0	2832.58	0	529	6645.53	2313.66	15168.1	5	153	7899.06	7	1	88.9608	2
F11	80	0.43	Sambar	Mmammal	yes	Erawan	Forest	Deciduous forest	1	2.32558	2852.95	0.957293	529	6674.51	2345.27	15137.2	5	418	17191.2	2	4	19.9506	3
F12	81	1	Sambar	Mmammal	no	Erawan	Forest	Deciduous forest	0	0	2862.35	0	529	6696.54	2373.6	15111.1	5	153	7911.2	7	1	77.3654	2
112	83	1	Wildboar	Mmammal	no	Erawan	Forest	Deciduous forest	0	0	3033.61	1.33274	522	6425.64	1948.79	15584.8	5	295	7794.27	7	1	95.5438	2
113	84	0.332	Wildboar	Mmammal	no	Erawan	Forest	Deciduous forest	0	0	2103.01	6.72444	81	4135.19	434.43	17889.9	11	418	17263.5	2	4	60.5092	3
114	85	0.413	Wildboar	Mmammal	yes	Erawan	Forest	Deciduous forest	2	4.84262	2112.18	6.72444	81	4126.26	448.262	17902.5	11	153	6974.77	10	1	5.38042	4
F14	86	0.206	Wildboar	Mmammal	yes	Erawan	Forest	Deciduous forest	1	4.85437	2049.47	17.0113	94	4011.86	520.586	17989	11	418	17236.7	2	4	22.9001	3
F17	87	0.091	Wildboar	Mmammal	yes	Erawan	Forest	Deciduous forest	2	21.978	2120.42	6.72444	81	4130.06	450.176	17902.2	11	153	7275.21	10	1	51.93	3
F13	88	0.11236	Wildboar	Mmammal	no	Erawan	Forest	Deciduous forest	0	0	2050.3	17.0113	94	4015.85	517.164	17985.4	11	418	17184.2	2	4	27.0044	3
F15	89	0.106	Wildboar	Mmammal	no	Erawan	Forest	Deciduous forest	0	0	2056.53	17.0113	94	4012.28	523.382	17991.4	11	418	17175.2	2	4	35.9073	3
F16	90	0.13365	Wildboar	Mmammal	no	Erawan	Forest	Deciduous forest	0	0	2052.46	17.0113	94	4016.68	517.353	17985.5	11	418	17226.8	2	4	13.8406	3
